# Supplementary material
Source: Springer Nature journal article supplement (https://www.springermedizin.de/resource/supplementary/12965_2011_94_MOESM6_ESM.pdf/9573092)

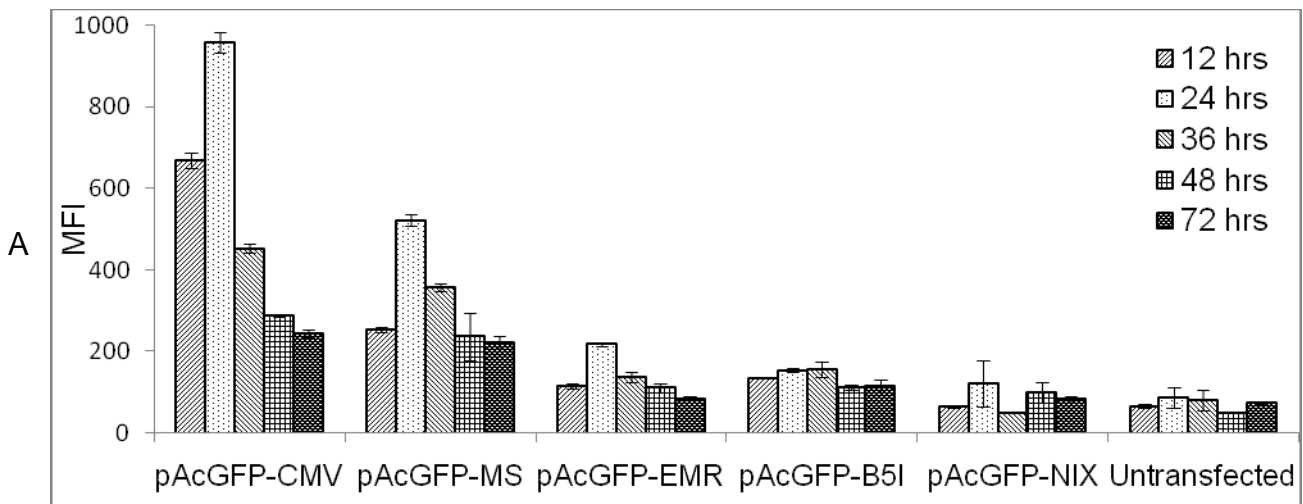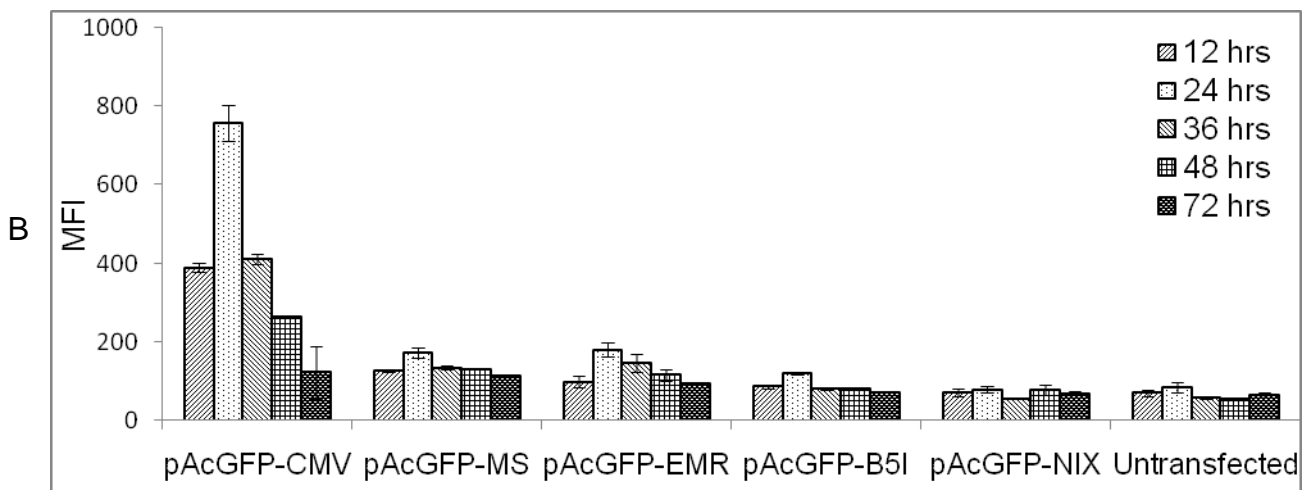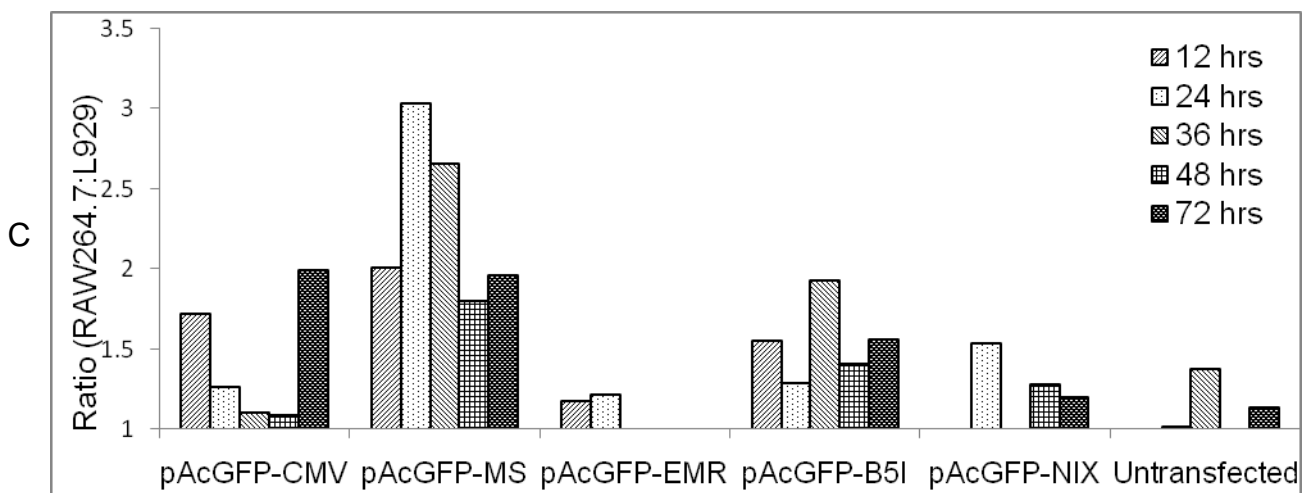

Supplement: MOESM6 [file 9573092]
